# Supplementary material for: Non-ketogenic combination of nutritional strategies provides robust protection against seizures
Source: PubMed Central journal article supplement (PMC5511156; doi:10.1038/s41598-017-05542-3), 2017-07-14
Supplement: 41598_2017_5542_MOESM1_ESM.pdf [file 41598_2017_5542_MOESM1_ESM.pdf]

# Supplementary information

Non-ketogenic combination of nutritional strategies  
allows robust protection against seizures

Glenn Dallérac<sup>1\*</sup>, Julien Moulard<sup>1</sup>, Jean-François Benoit<sup>2</sup>, Stefan Rouach<sup>1</sup>,  
Stéphane Auvin<sup>2</sup>, Angèle Guilbot<sup>3</sup>, Loïc Lenoir<sup>3</sup>, Nathalie Rouach<sup>1</sup>

<sup>1</sup>*Neuroglial Interactions in Cerebral Physiopathology, Center for Interdisciplinary Research in Biology, Collège de France, CNRS UMR 7241, INSERM U1050, Labex Memolife, PSL Research University, Paris, 75005, France.*

<sup>2</sup>*AP-HP, Hôpital Robert Debré, Service de Neurologie Pédiatrique, Paris, France.*

<sup>3</sup>*Laboratoire PILEJE, 37 quai de Grenelle, 75015 Paris, France.*

## Supplementary information

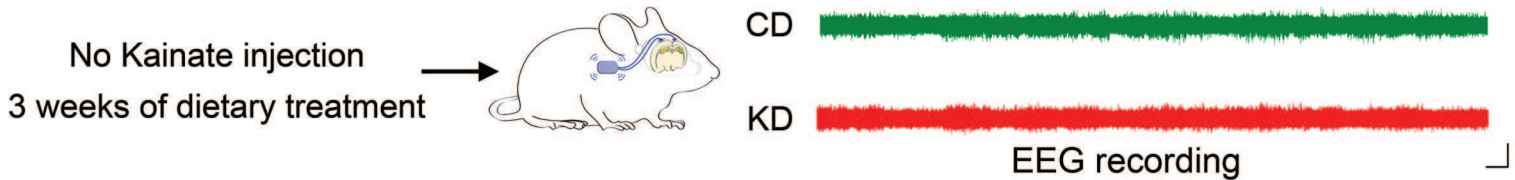

**Supplementary Figure 1: CD and KD diets do not induce epileptiform activities.** Mice fed for 3 weeks with CD (n=4) or KD (n=4) did not show any EEG-detected seizures. Traces show examples of 4 hours baseline EEG recordings. Calibrations: 10min, 100 $\mu$ V.

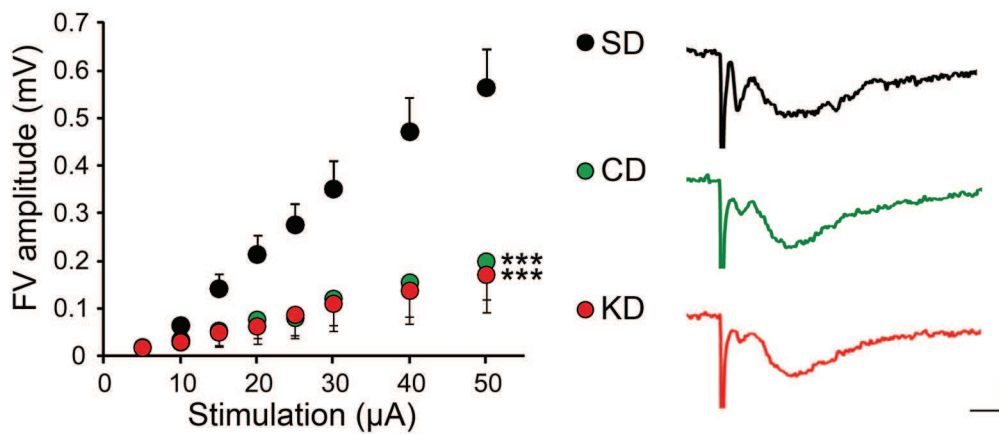

**Supplementary Figure 2: CD and KD diets induce a reduction in excitability in the epileptic hippocampus.** Analysis of the fibre volley amplitude as a function of stimulation intensity revealed a significant reduction in presynaptic excitability of CD and KD fed mice as compared to controls fed with SD (n=7 in each group;  $p < 0.001$  for both CD and KD). Calibrations bars: 5ms, 0, 2mV. \* $p < 0.001$ .
